# Supplementary material for: Association between right ventricular strain and outcomes in patients with dilated cardiomyopathy
Source: PubMed Central journal article supplement — Heart. 2020 Nov 2;107(15):1233–9. doi: 10.1136/heartjnl-2020-317949 (PMC8292584; doi:10.1136/heartjnl-2020-317949), 2020-11-02
Supplement: heartjnl-2020-317949supp003.pdf [file heartjnl-2020-317949supp003.pdf]

**Supplementary appendix**

Table S1 Distributions of variables with missing data comparing observed complete case data to results from pooling the datasets with imputed variables from multiple imputation

|                                    | Level/Unit | Number (%) with missing data | Complete case | Multiple imputation |
|------------------------------------|------------|------------------------------|---------------|---------------------|
| BNP (Box-Cox transform)<br>(pg/ml) | Mean       | 54 (28.1%)                   | 8.46          | 8.57                |
| Age (year)                         | Mean       | 1 (0.5%)                     | 53            | 53                  |
| sex                                | %          | 0 (0%)                       |               |                     |
| BMI (kg / m <sup>2</sup> )         | Mean       | 5 (2.6%)                     | 26            | 26                  |
| Creatinine(mmol/L)                 | Mean       | 16 (8.3%)                    | 82.53         | 82.66               |
| Na <sup>+</sup> (mmol/L)           | Mean       | 21 (10.9%)                   | 139.8         | 140.1               |
| Cl <sup>-</sup> (mmol/L)           | Mean       | 22 (11.4%)                   | 102.8         | 103.5               |
| LBBB on EKG (%)                    | %          | 5 (2.6%)                     | 17.65%        | 18.65%              |
| QRS duration on EKG<br>(mm)        | Mean       | 11 (5.7%)                    | 124.2         | 125.3               |
| Hemoglobin (HgB) (G/L)             | Mean       | 27 (14.0%)                   | 147.8         | 146.6               |

**Figure legends**

Figure S1. The linear relationship between CMR-RVpGLS and major adverse cardiac events in patients with stage C or D heart failure with non-ischemic dilated cardiomyopathy during a 5-year follow-up.

Figure S2. ROC curves for the association of RVpGLS and major adverse cardiac events. The analysis reveals that the cutoff RVpGLS  $-8.5$  (area under the curve: 0.698; sensitivity: 77.8%; specificity: 64%).
