# Supplementary figures and images for: Association between right ventricular strain and outcomes in patients with dilated cardiomyopathy
Source: PubMed Central journal article supplement — Heart. 2020 Nov 2;107(15):1233–9. doi: 10.1136/heartjnl-2020-317949 (PMC8292584; doi:10.1136/heartjnl-2020-317949), 2020-11-02

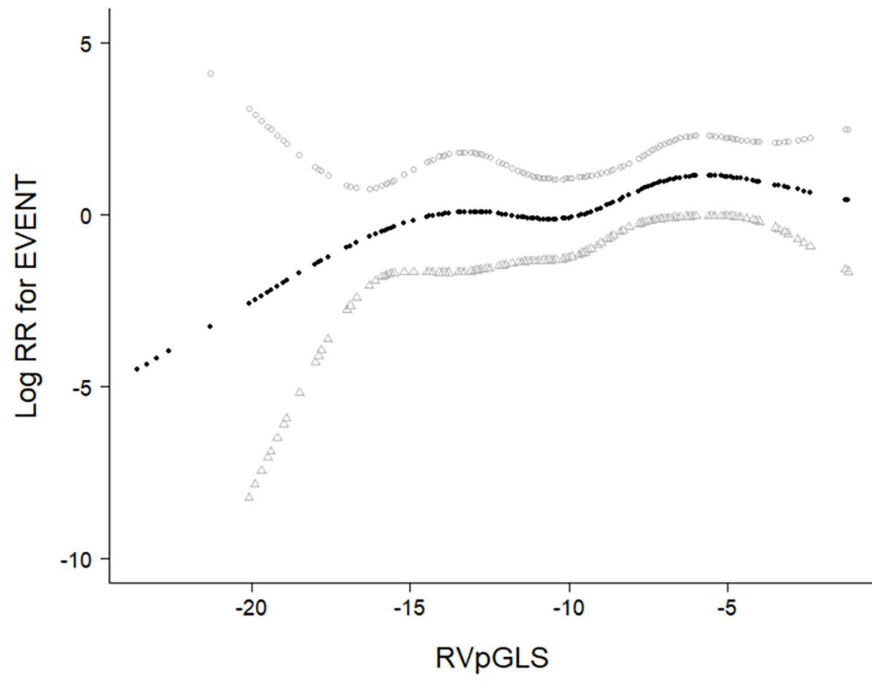

Supplement: heartjnl-2020-317949supp001.pdf [file heartjnl-2020-317949supp001.pdf]

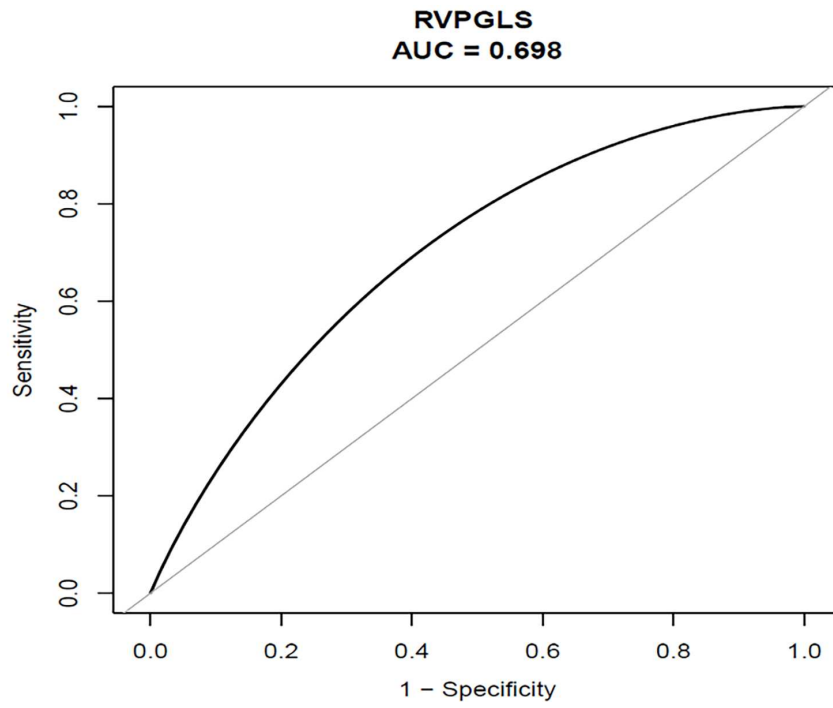

Supplement: heartjnl-2020-317949supp002.pdf [file heartjnl-2020-317949supp002.pdf]
